# Supplementary material for: lncRNA HIF1A Antisense RNA 2 Modulates Trophoblast Cell Invasion and Proliferation through Upregulating PHLDA1 Expression
Source: PubMed Central journal article supplement — Mol Ther Nucleic Acids. 2019 Apr 18;16:605–15. doi: 10.1016/j.omtn.2019.04.009 (PMC6517652; doi:10.1016/j.omtn.2019.04.009), 2019-04-18
Supplement: mmc1.pdf [file mmc1.pdf]

**OMTN, Volume 16**

**Supplemental Information**

**IncRNA HIF1A Antisense RNA 2 Modulates  
Trophoblast Cell Invasion and Proliferation  
through Upregulating PHLDA1 Expression**

**Dan Wu, Nana Yang, Yetao Xu, Sailan Wang, Yuanyuan Zhang, Matthew Sagnelli, Bingqing Hui, Zhenyao Huang, and Lizhou Sun**

## Supplemental Tables

**Table S1 qRT-PCR and oligonucleotide.**

| qPCR sequences |                                                          |
|----------------|----------------------------------------------------------|
| PHLDA1         | F: TGCCTGAAAGGGGCAGCTCC<br>R: TGATCTGGTGCGGGGCGGA        |
| TFPI2          | F: GCTGTCGATTCTGCTGCTTT<br>R: CAAGCCTCCCAGGTGTAGAA       |
| RND3           | F: AAAGAATAGAGTTGAGCCTGTGG<br>R: AAGAGCATTTTGGTATTTGGACA |
| GEM            | F: CTCAATCACAGACCGAGCGA<br>R: TTGGCTCTGCTCCTCTTACC       |
| SPRY2          | F: GCGATCACGGAGTTCAG<br>R: GTGGAGTCTCTCGTGT              |
| ADAM19         | F: CACTCCGAGAATGCCATTGG<br>R: TCCCTCCTGTTGCATCCATT       |
| SIK1           | F: CACACGGCAGGTTATCTC<br>R: GACCTACGCCCCACACATCT         |
| DUSP5          | F: CCGACCCACCTACACTACAAA<br>R: GTAGCTTCCATCAGGGCATCA     |
| SPRY4          | F: CCAGGATGTCACCCACCATTG<br>R: TGTGCTGCTGCTGCTC          |
| ERRFI1         | F: CGCTGTGATTGCTCTTCGCT                                  |

R: GGAGGACAAGCTAACCCGAAT

---

**siRNA Oligonucleotide**

---

|              |                                 |
|--------------|---------------------------------|
| si-HIF-1#    | 5'-GGCUCUGGCACUCCUACAUAUUU-3'   |
| si-HIF-2#    | 5'-GGGAACAGAUUAGAAAUCUUCAGAG-3' |
| si-HIF-3#    | 5'-GACUAUAAUGCUGAGAACUGCUUCA-3' |
| si-PHLDA1-1# | 5'-UGCAGUACAAGAAUCGUCAGGCCAU-3' |
| si-PHLDA1-2# | 5'-CCUUCAGUGAGCGCUCGCAAGAGGA-3' |
| si-PHLDA1-3# | 5'-UGCCUCCUGCGUGUUAGCCUCCUCU-3' |

---

**primers of NCALD  
promotor regions**

---

|        |                          |
|--------|--------------------------|
| PHLDA1 | 1F: GGCTAGGTCTCGGTTATGCC |
|        | 1R: AATGCAATACCCCCAGCTCC |
|        | 2F: AGAAGAAAGCCGAAGACGGG |
|        | 2R: TTCCCACGCATATTCGCTCA |
|        | 3F: CCCGGGCTAATTCCCAAGAA |
|        | 3R: CTCAGAAAGTGAGGACGGGG |
|        | 4F: TGAGCGAATATGCGTGGGAA |
|        | 4R: CCGGACGCCTAGGTAAACAA |
| TFPI2  | 1F: GCCTTTGAGGATTCTGGGGG |
|        | 1R: GGCTACATGGGAGACGAAGG |
|        | 2F: TTTGAGGATTCTGGGGGCTC |

2R: GGGAGACGAAGGGAGCAAAT  
 3F: CTTTGAGGATTCTGGGGGCTC  
 3R: TGGGAGACGAAGGGAGCAAA  
 4F: AGAGCCTTTGAGGATTCTGGG  
 4R: TTGGCTACATGGGAGACGAAG

SPRY2

1F: GAGAAGTCAGGGTGAGACCG  
 1R: TGCTTCACTCGTCCAGCTTT  
 2F: CTTTTGAATGCCTCCTGCGG  
 2R: ACAGAGCAGTTGTTGTCCCA  
 3F: GGACGAGTGAAGCACCATGT  
 3R: GTGGGAGCACCAGTGGAAAA

**Probe of FISH**

LncRNA HIF1A-AS2      5'-FAM- augagugaagcaguucucagcauuauaguc-3'

**Table S2 Analysis of the RNA transcriptome sequencing data.**

| GeneID    | NC<br>Expression | HIF1AAS2<br>Expression | log2FoldChange<br>HIF1AAS2/NC | FDR      | Up/Down<br>Regulation | P value  | Symbol   |
|-----------|------------------|------------------------|-------------------------------|----------|-----------------------|----------|----------|
| 8293      | 0.01             | 6.74                   | 9.396604781                   | 3.77E-28 | Up                    | 7.97E-30 | SERF1A   |
| 100861437 | 0.01             | 5.86                   | 9.194756854                   | 4.29E-10 | Up                    | 2.95E-11 | NARR     |
| 8710      | 0.01             | 4.36                   | 8.768184325                   | 2.59E-21 | Up                    | 7.32E-23 | SERPINB7 |
| 3885      | 0.01             | 4.33                   | 8.758223215                   | 4.80E-16 | Up                    | 1.91E-17 | KRT34    |

|           |      |       |             |             |    |                |              |
|-----------|------|-------|-------------|-------------|----|----------------|--------------|
| 692094    | 0.01 | 4.18  | 8.707359132 | 4.45E-06    | Up | 5.31E-07       | MSMP         |
| 4207      | 0.01 | 2.05  | 7.6794801   | 1.25E-08    | Up | 1.04E-09       | BORCS8-MEF2B |
| 4322      | 0.01 | 1.88  | 7.554588852 | 3.30E-11    | Up | 2.04E-12       | MMP13        |
| 414060    | 0.01 | 1.59  | 7.312882955 | 3.63E-07    | Up | 3.67E-08       | TBC1D3C      |
| 729877    | 0.01 | 1.18  | 6.882643049 | 2.33E-05    | Up | 3.15E-06       | TBC1D3H      |
| 100128553 | 0.01 | 1.08  | 6.754887502 | 4.45E-06    | Up | 5.31E-07       | CTAGE4       |
| 107986353 | 0.01 | 0.93  | 6.539158811 | 3.63E-07    | Up | 3.67E-08       | LOC107986353 |
| 150221    | 0.01 | 0.7   | 6.129283017 | 5.44E-09    | Up | 4.27E-10       | RIMBP3C      |
| 100526740 | 0.02 | 1.38  | 6.108524457 | 2.14E-15    | Up | 9.03E-17       | ATP5J2-PTCD1 |
| 4314      | 0.19 | 12.74 | 6.067222049 | 2.22E-48    | Up | 2.43E-50       | MMP3         |
| 441430    | 0.01 | 0.66  | 6.044394119 | 0.000619299 | Up | 0.000111<br>12 | ANKRD20A2    |
| 102725035 | 0.01 | 0.59  | 5.882643049 | 0.000619512 | Up | 0.000111<br>12 | LOC102725035 |
| 23117     | 0.01 | 0.59  | 5.882643049 | 0.000121207 | Up | 1.87E-05       | NPIP3        |
| 4312      | 0.44 | 22.62 | 5.683951595 | 7.16E-92    | Up | 3.09E-94       | MMP1         |
| 127294    | 0.01 | 0.5   | 5.64385619  | 1.94E-06    | Up | 2.18E-07       | MYOM3        |
| 145781    | 0.01 | 0.49  | 5.614709844 | 1.02E-05    | Up | 1.29E-06       | GCOM1        |
| 3598      | 0.09 | 3.15  | 5.129283017 | 3.30E-08    | Up | 2.86E-09       | IL13RA2      |
| 11009     | 0.99 | 28.57 | 4.850928701 | 5.83E-96    | Up | 2.34E-98       | IL24         |
| 23617     | 0.04 | 1.08  | 4.754887502 | 0.000275341 | Up | 4.56E-05       | TSSK2        |
| 5055      | 0.25 | 6.54  | 4.709290636 | 3.09E-22    | Up | 8.47E-24       | SERPINB2     |
| 5801      | 0.13 | 2.84  | 4.449307401 | 5.50E-13    | Up | 2.90E-14       | PTPRR        |
| 150094    | 0.14 | 2.93  | 4.387401932 | 4.25E-24    | Up | 1.05E-25       | SIK1         |

|           |       |        |             |             |    |                 |              |
|-----------|-------|--------|-------------|-------------|----|-----------------|--------------|
| 25907     | 1.28  | 23.41  | 4.192909219 | 1.07E-71    | Up | 6.79E-74        | TMEM158      |
| 55567     | 0.04  | 0.73   | 4.189824559 | 2.41E-08    | Up | 2.05E-09        | DNAH3        |
| 6123      | 0.08  | 1.25   | 3.965784285 | 0.000412218 | Up | 7.11E-05        | RPL3L        |
| 114960    | 0.08  | 1.21   | 3.918863237 | 0.000193135 | Up | 3.10E-05        | TSGA13       |
| 27063     | 1.14  | 16.74  | 3.876193798 | 2.38E-51    | Up | 2.37E-53        | ANKRD1       |
| 7980      | 21.82 | 281.28 | 3.688283969 | 0           | Up | 0               | TFPI2        |
| 3814      | 1.18  | 15.07  | 3.674820652 | 6.84E-16    | Up | 2.73E-17        | KISS1        |
| 51129     | 1.34  | 15.45  | 3.527301932 | 4.03E-42    | Up | 5.32E-44        | ANGPTL4      |
| 4600      | 0.06  | 0.69   | 3.523561956 | 0.000875663 | Up | 0.000162<br>144 | MX2          |
| 316       | 0.87  | 8.99   | 3.36923381  | 2.31E-60    | Up | 1.86E-62        | AOX1         |
| 100134938 | 0.7   | 7.17   | 3.356546292 | 6.20E-14    | Up | 2.99E-15        | UPK3BL1      |
| 50486     | 4.49  | 43.93  | 3.290419149 | 4.14E-56    | Up | 3.55E-58        | GOS2         |
| 58538     | 0.3   | 2.84   | 3.242856524 | 8.38E-09    | Up | 6.79E-10        | MPP4         |
| 11262     | 0.29  | 2.56   | 3.142019005 | 4.80E-05    | Up | 6.87E-06        | SP140        |
| 57214     | 1.08  | 9.53   | 3.141444902 | 1.40E-87    | Up | 6.49E-90        | CEMIP        |
| 56137     | 0.05  | 0.42   | 3.070389328 | 0.000412071 | Up | 7.11E-05        | PCDHA12      |
| 136332    | 0.13  | 1.09   | 3.067744607 | 9.74E-05    | Up | 1.47E-05        | LRGUK        |
| 654       | 0.16  | 1.31   | 3.033423002 | 2.14E-05    | Up | 2.88E-06        | BMP6         |
| 7185      | 0.51  | 4.13   | 3.017572629 | 1.37E-22    | Up | 3.68E-24        | TRAF1        |
| 57016     | 0.19  | 1.52   | 3           | 0.000877185 | Up | 0.000162<br>48  | AKR1B10      |
| 202658    | 0.37  | 2.94   | 2.990218979 | 2.62E-06    | Up | 3.02E-07        | TRIM39-RPP21 |
| 390       | 38.53 | 305.25 | 2.985937204 | 0           | Up | 0               | RND3         |

|           |       |        |             |             |    |                 |              |
|-----------|-------|--------|-------------|-------------|----|-----------------|--------------|
| 4907      | 1.51  | 11.84  | 2.971048626 | 1.08E-58    | Up | 9.02E-61        | NT5E         |
| 11082     | 0.8   | 6.17   | 2.947198584 | 1.22E-15    | Up | 5.05E-17        | ESM1         |
| 23643     | 0.66  | 4.76   | 2.850423644 | 0.000761873 | Up | 0.000139<br>475 | LY96         |
| 64078     | 0.1   | 0.71   | 2.827819025 | 0.000321082 | Up | 5.40E-05        | SLC28A3      |
| 116211    | 1.66  | 11.58  | 2.802380107 | 1.97E-14    | Up | 9.02E-16        | TM4SF19      |
| 7111      | 0.13  | 0.9    | 2.791413378 | 0.000387835 | Up | 6.64E-05        | TMOD1        |
| 100861412 | 0.2   | 1.35   | 2.754887502 | 2.02E-08    | Up | 1.71E-09        | FSBP         |
| 2919      | 0.64  | 4.26   | 2.73470962  | 7.69E-06    | Up | 9.54E-07        | CXCL1        |
| 10468     | 0.96  | 6.22   | 2.695808269 | 1.14E-16    | Up | 4.34E-18        | FST          |
| 54206     | 8.68  | 55.03  | 2.664451381 | 3.36E-182   | Up | 4.36E-18<br>5   | ERRFI1       |
| 6446      | 10.16 | 59.88  | 2.559173819 | 5.77E-148   | Up | 1.21E-15<br>0   | SGK1         |
| 3576      | 6.29  | 37.06  | 2.558730959 | 1.46E-64    | Up | 1.06E-66        | CXCL8        |
| 3371      | 0.29  | 1.69   | 2.542898441 | 2.66E-12    | Up | 1.49E-13        | TNC          |
| 9510      | 1.65  | 9.44   | 2.516320835 | 1.53E-44    | Up | 1.84E-46        | ADAMTS1      |
| 5054      | 11.79 | 64.91  | 2.460877038 | 1.72E-198   | Up | 1.80E-20<br>1   | SERPINE1     |
| 107986876 | 0.24  | 1.32   | 2.459431619 | 0.000475476 | Up | 8.32E-05        | LOC107986876 |
| 1827      | 18.74 | 102.05 | 2.445083324 | 7.43E-252   | Up | 4.59E-25<br>5   | RCAN1        |
| 114801    | 0.64  | 3.4    | 2.409390936 | 1.40E-10    | Up | 9.22E-12        | TMEM200A     |
| 7078      | 7.73  | 40.84  | 2.401442547 | 9.67E-214   | Up | 8.36E-21<br>7   | TIMP3        |
| 8325      | 1.46  | 7.56   | 2.372417865 | 8.23E-23    | Up | 2.16E-24        | FZD8         |

|        |       |        |             |             |    |                 |          |
|--------|-------|--------|-------------|-------------|----|-----------------|----------|
| 283518 | 0.46  | 2.37   | 2.365181293 | 0.00035774  | Up | 6.07E-05        | KCNRG    |
| 4929   | 0.23  | 1.17   | 2.346802764 | 4.20E-05    | Up | 5.92E-06        | NR4A2    |
| 1305   | 1.01  | 5.12   | 2.341788517 | 2.57E-14    | Up | 1.19E-15        | COL13A1  |
| 92949  | 0.19  | 0.95   | 2.321928095 | 0.00065551  | Up | 0.000118<br>386 | ADAMTSL1 |
| 8214   | 1.31  | 6.45   | 2.299732349 | 1.26E-07    | Up | 1.19E-08        | DGCR6    |
| 2669   | 1.17  | 5.71   | 2.286982216 | 2.33E-11    | Up | 1.42E-12        | GEM      |
| 11343  | 0.53  | 2.54   | 2.260764232 | 2.67E-08    | Up | 2.28E-09        | MGLL     |
| 768    | 1     | 4.76   | 2.250961574 | 5.79E-07    | Up | 6.05E-08        | CA9      |
| 5649   | 0.36  | 1.64   | 2.187627003 | 1.33E-16    | Up | 5.09E-18        | RELN     |
| 140456 | 0.48  | 2.08   | 2.115477217 | 3.87E-05    | Up | 5.43E-06        | ASB11    |
| 2827   | 0.5   | 2.16   | 2.111031312 | 0.000243484 | Up | 3.99E-05        | GPR3     |
| 2246   | 0.51  | 2.18   | 2.095758983 | 6.84E-07    | Up | 7.25E-08        | FGF1     |
| 10326  | 1.16  | 4.82   | 2.054908341 | 6.82E-09    | Up | 5.47E-10        | SIRPB1   |
| 9201   | 0.76  | 3.07   | 2.014167332 | 9.26E-17    | Up | 3.50E-18        | DCLK1    |
| 1847   | 6.46  | 25.92  | 2.004459648 | 1.67E-49    | Up | 1.76E-51        | DUSP5    |
| 81848  | 0.7   | 2.8    | 2           | 6.28E-11    | Up | 3.97E-12        | SPRY4    |
| 114907 | 1.08  | 4.32   | 2           | 1.78E-22    | Up | 4.82E-24        | FBXO32   |
| 4071   | 36.39 | 143.73 | 1.981747263 | 4.56E-180   | Up | 6.18E-18<br>3   | TM4SF1   |
| 3592   | 0.83  | 3.23   | 1.960350923 | 0.00052092  | Up | 9.21E-05        | IL12A    |
| 10253  | 3.19  | 12.36  | 1.954050414 | 2.96E-20    | Up | 9.03E-22        | SPRY2    |
| 26585  | 1.86  | 7.12   | 1.93657462  | 3.24E-21    | Up | 9.18E-23        | GREM1    |
| 11199  | 3.82  | 14.49  | 1.923413052 | 5.12E-15    | Up | 2.24E-16        | ANXA10   |

|           |       |       |             |             |    |                 |              |
|-----------|-------|-------|-------------|-------------|----|-----------------|--------------|
| 85450     | 1.79  | 6.77  | 1.919196246 | 2.03E-32    | Up | 3.64E-34        | ITPRIP       |
| 26872     | 1.14  | 4.31  | 1.918654045 | 8.41E-05    | Up | 1.26E-05        | STEAP1       |
| 9732      | 0.59  | 2.23  | 1.918256851 | 1.88E-12    | Up | 1.03E-13        | DOCK4        |
| 64859     | 13.29 | 50    | 1.91158699  | 6.05E-111   | Up | 2.02E-11<br>3   | NABP1        |
| 101928841 | 0.27  | 1     | 1.888968688 | 8.70E-07    | Up | 9.33E-08        | LOC101928841 |
| 6422      | 12.58 | 45.82 | 1.864845536 | 4.48E-140   | Up | 9.94E-14<br>3   | SFRP1        |
| 1839      | 6.72  | 24.28 | 1.853235283 | 4.88E-39    | Up | 7.11E-41        | HBEGF        |
| 56911     | 6.86  | 24.67 | 1.846477234 | 2.32E-29    | Up | 4.64E-31        | MAP3K7CL     |
| 2921      | 1.12  | 4.02  | 1.843696769 | 0.000899748 | Up | 0.000167<br>048 | CXCL3        |
| 23645     | 20.99 | 74.85 | 1.83430015  | 7.40E-119   | Up | 2.10E-12<br>1   | PPP1R15A     |
| 9734      | 2.75  | 9.76  | 1.827449529 | 2.57E-20    | Up | 7.79E-22        | HDAC9        |
| 3914      | 9.03  | 32.03 | 1.826625905 | 6.41E-90    | Up | 2.81E-92        | LAMB3        |
| 10397     | 18.76 | 64.05 | 1.771538743 | 7.45E-128   | Up | 1.93E-13<br>0   | NDRG1        |
| 26191     | 1.49  | 5.08  | 1.769516166 | 9.70E-08    | Up | 9.03E-09        | PTPN22       |
| 10202     | 3.83  | 12.89 | 1.750835966 | 1.54E-13    | Up | 7.69E-15        | DHRS2        |
| 79875     | 0.36  | 1.21  | 1.748938236 | 2.08E-07    | Up | 2.03E-08        | THSD4        |
| 1846      | 0.67  | 2.25  | 1.747692001 | 1.62E-08    | Up | 1.35E-09        | DUSP4        |
| 9518      | 19.55 | 65.2  | 1.737703357 | 3.39E-48    | Up | 3.73E-50        | GDF15        |
| 728689    | 4.08  | 13.47 | 1.723108793 | 2.77E-17    | Up | 1.01E-18        | EIF3CL       |
| 100533467 | 0.91  | 3     | 1.72102405  | 6.65E-10    | Up | 4.69E-11        | BIVM-ERCC5   |

|        |       |        |             |             |    |               |          |
|--------|-------|--------|-------------|-------------|----|---------------|----------|
| 5606   | 14.7  | 48.17  | 1.712318769 | 1.50E-65    | Up | 1.07E-67      | MAP2K3   |
| 5362   | 0.56  | 1.83   | 1.708344916 | 1.36E-08    | Up | 1.13E-09      | PLXNA2   |
| 5997   | 3.51  | 11.35  | 1.693149362 | 1.25E-09    | Up | 9.15E-11      | RGS2     |
| 1848   | 4.65  | 14.99  | 1.688697762 | 2.83E-30    | Up | 5.41E-32      | DUSP6    |
| 22822  | 19.63 | 63.2   | 1.686864386 | 2.34E-221   | Up | 1.88E-22<br>4 | PHLDA1   |
| 7424   | 3.81  | 12.26  | 1.686096076 | 1.71E-15    | Up | 7.13E-17      | VEGFC    |
| 5327   | 4.52  | 14.27  | 1.658590657 | 2.16E-27    | Up | 4.68E-29      | PLAT     |
| 5329   | 24.71 | 77.73  | 1.653376506 | 3.56E-56    | Up | 3.03E-58      | PLAUR    |
| 135    | 1.72  | 5.36   | 1.639824436 | 1.16E-07    | Up | 1.09E-08      | ADORA2A  |
| 58489  | 2.72  | 8.47   | 1.638755318 | 6.11E-12    | Up | 3.53E-13      | ABHD17C  |
| 129303 | 1.68  | 5.21   | 1.632822139 | 2.54E-05    | Up | 3.46E-06      | TMEM150A |
| 50649  | 1.35  | 4.18   | 1.630543535 | 0.000247875 | Up | 4.07E-05      | ARHGEF4  |
| 7730   | 1.33  | 4.1    | 1.624197664 | 3.77E-06    | Up | 4.44E-07      | ZNF177   |
| 8482   | 1.52  | 4.65   | 1.613159393 | 1.57E-09    | Up | 1.17E-10      | SEMA7A   |
| 4502   | 67.91 | 207.71 | 1.612874738 | 5.48E-50    | Up | 5.65E-52      | MT2A     |
| 79669  | 2.08  | 6.36   | 1.612443237 | 7.01E-08    | Up | 6.38E-09      | C3orf52  |
| 6809   | 15.63 | 47.62  | 1.607249842 | 7.19E-64    | Up | 5.32E-66      | STX3     |
| 2012   | 16.3  | 49.43  | 1.600514942 | 1.39E-75    | Up | 7.98E-78      | EMP1     |
| 837    | 38.75 | 115.73 | 1.578494679 | 2.25E-80    | Up | 1.19E-82      | CASP4    |
| 2297   | 4.38  | 12.97  | 1.566175705 | 7.80E-16    | Up | 3.15E-17      | FOXD1    |
| 50515  | 1.64  | 4.84   | 1.561311233 | 4.07E-15    | Up | 1.75E-16      | CHST11   |
| 22934  | 4.58  | 13.43  | 1.552039801 | 3.24E-13    | Up | 1.68E-14      | RPIA     |
| 10105  | 41.52 | 121.53 | 1.549434142 | 8.24E-115   | Up | 2.49E-11      | PPIF     |

|           |       |       |             |           |    |               |              |
|-----------|-------|-------|-------------|-----------|----|---------------|--------------|
| 8793      | 15.11 | 44.04 | 1.543310808 | 1.85E-81  | Up | 9.49E-84      | TNFRSF10D    |
| 57476     | 3.42  | 9.85  | 1.526127399 | 2.85E-36  | Up | 4.59E-38      | GRAMD1B      |
| 8942      | 3.28  | 9.27  | 1.498873524 | 6.28E-09  | Up | 4.99E-10      | KYNU         |
| 51175     | 4.18  | 11.79 | 1.495988871 | 1.21E-13  | Up | 5.95E-15      | TUBE1        |
| 90874     | 2.79  | 7.86  | 1.49426419  | 1.57E-19  | Up | 4.98E-21      | ZNF697       |
| 10007     | 38.74 | 108.8 | 1.489782698 | 9.77E-122 | Up | 2.71E-12<br>4 | GNPDA1       |
| 7128      | 1.31  | 3.66  | 1.482276837 | 5.87E-09  | Up | 4.63E-10      | TNFAIP3      |
| 4783      | 2.82  | 7.87  | 1.480668473 | 7.37E-09  | Up | 5.92E-10      | NFIL3        |
| 83931     | 7.27  | 19.89 | 1.452016007 | 8.34E-35  | Up | 1.41E-36      | STK40        |
| 57522     | 2.79  | 7.58  | 1.441932726 | 1.17E-18  | Up | 3.94E-20      | SRGAP1       |
| 91        | 4.12  | 11.12 | 1.432440546 | 4.99E-11  | Up | 3.12E-12      | ACVR1B       |
| 3976      | 3.12  | 8.42  | 1.432274204 | 9.46E-16  | Up | 3.85E-17      | LIF          |
| 123       | 11.77 | 31.62 | 1.425723047 | 1.88E-28  | Up | 3.90E-30      | PLIN2        |
| 134637    | 2.79  | 7.45  | 1.416975304 | 7.58E-05  | Up | 1.12E-05      | ADAT2        |
| 6533      | 3.58  | 9.5   | 1.407967926 | 1.87E-20  | Up | 5.65E-22      | SLC6A6       |
| 160760    | 1.27  | 3.37  | 1.407920094 | 2.53E-06  | Up | 2.91E-07      | PPTC7        |
| 4097      | 7.61  | 20.05 | 1.397633878 | 1.04E-44  | Up | 1.24E-46      | MAFG         |
| 8061      | 13.99 | 36.7  | 1.391384101 | 1.07E-27  | Up | 2.29E-29      | FOSL1        |
| 6875      | 2.29  | 6     | 1.389614902 | 1.12E-07  | Up | 1.05E-08      | TAF4B        |
| 102724159 | 4.94  | 12.92 | 1.387023123 | 3.09E-19  | Up | 9.99E-21      | LOC102724159 |
| 3678      | 36.5  | 95.18 | 1.382761991 | 4.35E-178 | Up | 6.17E-18<br>1 | ITGA5        |

|           |       |        |             |             |    |               |          |
|-----------|-------|--------|-------------|-------------|----|---------------|----------|
| 25890     | 2.82  | 7.35   | 1.382049087 | 1.92E-15    | Up | 8.04E-17      | ABI3BP   |
| 10068     | 1.39  | 3.62   | 1.380904814 | 0.000287568 | Up | 4.78E-05      | IL18BP   |
| 55691     | 2.46  | 6.4    | 1.37941359  | 4.56E-14    | Up | 2.17E-15      | FRMD4A   |
| 28951     | 1.16  | 3.01   | 1.375638682 | 1.94E-06    | Up | 2.17E-07      | TRIB2    |
| 114880    | 0.49  | 1.27   | 1.373974843 | 0.000106611 | Up | 1.63E-05      | OSBPL6   |
| 3673      | 2.54  | 6.47   | 1.348937215 | 5.88E-22    | Up | 1.63E-23      | ITGA2    |
| 64147     | 1.28  | 3.26   | 1.348728154 | 0.000431648 | Up | 7.49E-05      | KIF9     |
| 153222    | 3.57  | 9.06   | 1.343586976 | 4.03E-16    | Up | 1.59E-17      | CREBRF   |
| 8660      | 0.66  | 1.67   | 1.339310173 | 1.37E-05    | Up | 1.78E-06      | IRS2     |
| 92737     | 1.92  | 4.8    | 1.321928095 | 5.46E-07    | Up | 5.67E-08      | DNER     |
| 9353      | 1.87  | 4.67   | 1.32038428  | 7.37E-17    | Up | 2.77E-18      | SLIT2    |
| 9903      | 4.97  | 12.41  | 1.320185359 | 8.35E-24    | Up | 2.09E-25      | KLHL21   |
| 4609      | 31    | 76.78  | 1.308462345 | 4.33E-73    | Up | 2.65E-75      | MYC      |
| 23764     | 11.17 | 27.51  | 1.300326954 | 7.50E-27    | Up | 1.67E-28      | MAFF     |
| 5270      | 40.96 | 100.66 | 1.297202882 | 8.99E-88    | Up | 4.05E-90      | SERPINE2 |
| 101060226 | 3.26  | 8.01   | 1.296930278 | 1.57E-12    | Up | 8.58E-14      | NBPF19   |
| 206358    | 2.2   | 5.4    | 1.295455884 | 1.78E-06    | Up | 1.99E-07      | SLC36A1  |
| 8496      | 24.62 | 60.22  | 1.290411946 | 2.26E-138   | Up | 5.31E-14<br>1 | PPFIBP1  |
| 55966     | 4.01  | 9.76   | 1.283278911 | 2.78E-17    | Up | 1.02E-18      | AJAP1    |
| 26018     | 2.54  | 6.16   | 1.278101854 | 5.51E-13    | Up | 2.91E-14      | LRIG1    |
| 9907      | 5.88  | 14.26  | 1.278085922 | 6.97E-17    | Up | 2.62E-18      | AP5Z1    |
| 28996     | 0.43  | 1.04   | 1.274174963 | 9.19E-07    | Up | 9.89E-08      | HIPK2    |
| 2118      | 4.69  | 11.33  | 1.272488033 | 9.82E-11    | Up | 6.38E-12      | ETV4     |

|        |       |       |             |             |    |               |          |
|--------|-------|-------|-------------|-------------|----|---------------|----------|
| 7052   | 10.84 | 26.15 | 1.27044619  | 2.16E-46    | Up | 2.45E-48      | TGM2     |
| 127262 | 5.43  | 13.09 | 1.269440994 | 1.32E-12    | Up | 7.16E-14      | TPRG1L   |
| 285704 | 9.31  | 22.43 | 1.268576548 | 6.43E-36    | Up | 1.05E-37      | RGMB     |
| 2290   | 2.7   | 6.48  | 1.263034406 | 1.76E-08    | Up | 1.47E-09      | FOXG1    |
| 10370  | 37.45 | 89.74 | 1.260785465 | 1.44E-65    | Up | 1.01E-67      | CITED2   |
| 89795  | 13.01 | 30.99 | 1.252181793 | 3.50E-113   | Up | 1.12E-11<br>5 | NAV3     |
| 11259  | 2.1   | 5     | 1.251538767 | 5.09E-06    | Up | 6.14E-07      | FILIP1L  |
| 64093  | 2.88  | 6.84  | 1.247927513 | 4.96E-10    | Up | 3.45E-11      | SMOC1    |
| 2294   | 2.04  | 4.83  | 1.243454037 | 3.72E-05    | Up | 5.21E-06      | FOXF1    |
| 1288   | 0.98  | 2.32  | 1.243271151 | 6.34E-06    | Up | 7.79E-07      | COL4A6   |
| 10123  | 4.53  | 10.71 | 1.241375525 | 2.51E-16    | Up | 9.77E-18      | ARL4C    |
| 9955   | 2.96  | 6.99  | 1.23969528  | 3.07E-11    | Up | 1.89E-12      | HS3ST3A1 |
| 57613  | 4.67  | 11.02 | 1.238629769 | 1.17E-19    | Up | 3.69E-21      | FAM234B  |
| 55076  | 9.48  | 22.07 | 1.219127665 | 4.32E-13    | Up | 2.26E-14      | TMEM45A  |
| 4254   | 5.55  | 12.92 | 1.219046393 | 9.17E-26    | Up | 2.13E-27      | KITLG    |
| 414189 | 3.54  | 8.23  | 1.21714307  | 4.69E-07    | Up | 4.81E-08      | AGAP6    |
| 220213 | 2.28  | 5.3   | 1.216958535 | 1.54E-06    | Up | 1.71E-07      | OTUD1    |
| 8728   | 5.32  | 12.34 | 1.213844244 | 2.45E-31    | Up | 4.53E-33      | ADAM19   |
| 64782  | 17.33 | 40.12 | 1.211049951 | 2.06E-47    | Up | 2.30E-49      | AEN      |
| 25822  | 4.72  | 10.9  | 1.20746937  | 5.94E-10    | Up | 4.16E-11      | DNAJB5   |
| 80045  | 3.33  | 7.68  | 1.205584134 | 1.71E-05    | Up | 2.25E-06      | GPR157   |
| 9792   | 2.04  | 4.7   | 1.204091605 | 8.43E-10    | Up | 6.01E-11      | SERTAD2  |
| 57666  | 0.95  | 2.18  | 1.198328716 | 0.000737445 | Up | 0.000134      | FBRSL1   |

|           |       |        |             |             |    |                 |          |
|-----------|-------|--------|-------------|-------------|----|-----------------|----------|
| 29057     | 4.93  | 11.31  | 1.197939378 | 2.35E-10    | Up | 1.58E-11        | FAM156A  |
| 599       | 4.98  | 11.41  | 1.196081144 | 1.27E-14    | Up | 5.76E-16        | BCL2L2   |
| 81606     | 1.45  | 3.32   | 1.195130341 | 0.000330948 | Up | 5.58E-05        | LBH      |
| 148641    | 1.22  | 2.79   | 1.193383974 | 0.000979468 | Up | 0.000183<br>964 | SLC35F3  |
| 91373     | 3.43  | 7.84   | 1.192645078 | 8.07E-08    | Up | 7.41E-09        | UAP1L1   |
| 57478     | 4.7   | 10.7   | 1.186878135 | 1.03E-11    | Up | 6.08E-13        | USP31    |
| 85414     | 2.61  | 5.94   | 1.186413124 | 7.74E-09    | Up | 6.24E-10        | SLC45A3  |
| 54972     | 6.54  | 14.82  | 1.180182907 | 8.89E-19    | Up | 2.93E-20        | TMEM132A |
| 115123    | 3.83  | 8.67   | 1.178687601 | 1.66E-07    | Up | 1.61E-08        | 3-Mar    |
| 1026      | 97.32 | 219.98 | 1.176564138 | 7.44E-163   | Up | 1.24E-16<br>5   | CDKN1A   |
| 100101267 | 1     | 2.25   | 1.169925001 | 4.13E-05    | Up | 5.82E-06        | POM121C  |
| 868       | 3.65  | 8.2    | 1.167727446 | 1.13E-10    | Up | 7.36E-12        | CBLB     |
| 5874      | 1.5   | 3.36   | 1.163498732 | 0.000218097 | Up | 3.54E-05        | RAB27B   |
| 440138    | 1.87  | 4.18   | 1.160464672 | 0.000242269 | Up | 3.97E-05        | ALG11    |
| 220323    | 4.96  | 11.08  | 1.159545856 | 1.02E-07    | Up | 9.49E-09        | OAF      |
| 3589      | 25.01 | 55.77  | 1.156984213 | 1.33E-43    | Up | 1.70E-45        | IL11     |
| 9945      | 13.27 | 29.55  | 1.15498976  | 1.27E-31    | Up | 2.31E-33        | GFPT2    |
| 284217    | 8.1   | 18.03  | 1.154405584 | 4.74E-54    | Up | 4.33E-56        | LAMA1    |
| 7975      | 6.38  | 14.2   | 1.154262601 | 4.33E-13    | Up | 2.27E-14        | MAFK     |
| 57192     | 2.37  | 5.27   | 1.152915903 | 0.000249583 | Up | 4.10E-05        | MCOLN1   |
| 11221     | 2.62  | 5.82   | 1.151452341 | 1.05E-05    | Up | 1.32E-06        | DUSP10   |

|        |       |        |             |             |    |          |          |
|--------|-------|--------|-------------|-------------|----|----------|----------|
| 285761 | 6.17  | 13.69  | 1.149780052 | 1.24E-08    | Up | 1.03E-09 | DCBLD1   |
| 23119  | 3.01  | 6.66   | 1.14575869  | 4.02E-16    | Up | 1.58E-17 | HIC2     |
| 64866  | 1.45  | 3.19   | 1.137503524 | 3.23E-05    | Up | 4.47E-06 | CDCP1    |
| 898    | 9.25  | 20.29  | 1.133243594 | 2.61E-12    | Up | 1.46E-13 | CCNE1    |
| 8744   | 6.24  | 13.67  | 1.131395309 | 7.55E-08    | Up | 6.90E-09 | TNFSF9   |
| 25977  | 10.04 | 21.94  | 1.127804256 | 2.30E-18    | Up | 7.86E-20 | NECAP1   |
| 80380  | 2.37  | 5.16   | 1.122484007 | 0.000126244 | Up | 1.96E-05 | PDCD1LG2 |
| 80005  | 4.99  | 10.86  | 1.121912382 | 5.18E-08    | Up | 4.62E-09 | DOCK5    |
| 9223   | 0.91  | 1.98   | 1.12156198  | 6.64E-06    | Up | 8.16E-07 | MAGI1    |
| 24147  | 6.17  | 13.37  | 1.115657071 | 1.11E-11    | Up | 6.53E-13 | FJX1     |
| 7088   | 6.81  | 14.75  | 1.114988251 | 1.83E-18    | Up | 6.23E-20 | TLE1     |
| 23409  | 41.34 | 89.42  | 1.113059157 | 2.27E-38    | Up | 3.41E-40 | SIRT4    |
| 5128   | 19.9  | 42.99  | 1.11123268  | 5.69E-55    | Up | 5.02E-57 | CDK17    |
| 2745   | 23.39 | 50.16  | 1.100645486 | 1.00E-17    | Up | 3.53E-19 | GLRX     |
| 5163   | 7.74  | 16.53  | 1.094681253 | 1.06E-15    | Up | 4.38E-17 | PDK1     |
| 28231  | 27.26 | 58.12  | 1.092249141 | 2.14E-50    | Up | 2.16E-52 | SLCO4A1  |
| 7832   | 6.44  | 13.73  | 1.092199032 | 1.16E-11    | Up | 6.88E-13 | BTG2     |
| 7022   | 2.01  | 4.25   | 1.08026734  | 0.000264239 | Up | 4.36E-05 | TFAP2C   |
| 2034   | 3.58  | 7.55   | 1.076517057 | 5.86E-12    | Up | 3.37E-13 | EPAS1    |
| 3575   | 10.59 | 22.26  | 1.071751003 | 1.22E-29    | Up | 2.40E-31 | IL7R     |
| 5209   | 10.48 | 22.02  | 1.071175752 | 1.12E-24    | Up | 2.70E-26 | PFKFB3   |
| 4651   | 7.38  | 15.5   | 1.070575494 | 4.79E-39    | Up | 6.95E-41 | MYO10    |
| 94081  | 49.84 | 104.63 | 1.069920594 | 6.07E-62    | Up | 4.64E-64 | SFXN1    |

|        |       |       |             |          |    |          |          |
|--------|-------|-------|-------------|----------|----|----------|----------|
| 388    | 45.24 | 94.92 | 1.069113171 | 1.91E-65 | Up | 1.37E-67 | RHOB     |
| 11174  | 9.23  | 19.36 | 1.0686764   | 6.79E-19 | Up | 2.23E-20 | ADAMTS6  |
| 2114   | 4.79  | 10.04 | 1.067661708 | 8.47E-12 | Up | 4.95E-13 | ETS2     |
| 55238  | 20.71 | 43.39 | 1.067035033 | 1.74E-26 | Up | 3.91E-28 | SLC38A7  |
| 9842   | 11.54 | 24.16 | 1.065977231 | 1.51E-31 | Up | 2.77E-33 | PLEKHM1  |
| 64750  | 20.39 | 42.67 | 1.065360335 | 6.83E-49 | Up | 7.33E-51 | SMURF2   |
| 123879 | 3.35  | 7.01  | 1.065253349 | 7.01E-13 | Up | 3.73E-14 | DCUN1D3  |
| 1051   | 26.64 | 55.69 | 1.06382421  | 7.33E-34 | Up | 1.26E-35 | CEBPB    |
| 83985  | 13.64 | 28.49 | 1.062611977 | 8.24E-18 | Up | 2.90E-19 | SPNS1    |
| 2119   | 7.23  | 15.04 | 1.056737015 | 5.77E-18 | Up | 2.01E-19 | ETV5     |
| 1604   | 20.12 | 41.84 | 1.056252546 | 9.40E-28 | Up | 2.00E-29 | CD55     |
| 54984  | 7.42  | 15.43 | 1.05624697  | 6.72E-07 | Up | 7.11E-08 | PINX1    |
| 330    | 14.88 | 30.93 | 1.055632307 | 1.23E-41 | Up | 1.64E-43 | BIRC3    |
| 2004   | 5.18  | 10.76 | 1.054654075 | 4.92E-13 | Up | 2.59E-14 | ELK3     |
| 3491   | 24.5  | 50.85 | 1.053466025 | 4.53E-33 | Up | 7.94E-35 | CYR61    |
| 11153  | 4.29  | 8.89  | 1.051205771 | 9.29E-05 | Up | 1.40E-05 | FICD     |
| 11217  | 10.73 | 22.18 | 1.047609289 | 1.81E-44 | Up | 2.18E-46 | AKAP2    |
| 1611   | 7.25  | 14.96 | 1.045057275 | 2.07E-10 | Up | 1.38E-11 | DAP      |
| 342184 | 2.68  | 5.48  | 1.031942893 | 4.01E-21 | Up | 1.15E-22 | FMN1     |
| 1951   | 1.1   | 2.24  | 1.025995209 | 8.16E-08 | Up | 7.51E-09 | CELSR3   |
| 283820 | 11.54 | 23.37 | 1.01801451  | 1.53E-28 | Up | 3.15E-30 | NOMO2    |
| 9953   | 1.62  | 3.28  | 1.017702002 | 1.14E-05 | Up | 1.44E-06 | HS3ST3B1 |
| 1843   | 18.53 | 37.51 | 1.017412382 | 1.27E-20 | Up | 3.81E-22 | DUSP1    |

|           |       |       |              |             |      |          |              |
|-----------|-------|-------|--------------|-------------|------|----------|--------------|
| 3437      | 3.48  | 7.04  | 1.016488123  | 1.60E-05    | Up   | 2.10E-06 | IFIT3        |
| 115708    | 7.55  | 15.26 | 1.015206413  | 1.17E-13    | Up   | 5.76E-15 | TRMT61A      |
| 11334     | 22.74 | 45.95 | 1.014832607  | 6.23E-21    | Up   | 1.82E-22 | TUSC2        |
| 84879     | 3.75  | 7.57  | 1.013402705  | 3.23E-05    | Up   | 4.48E-06 | MFSD2A       |
| 26064     | 17.38 | 34.98 | 1.009102207  | 4.28E-46    | Up   | 4.88E-48 | RAI14        |
| 10954     | 3.58  | 7.17  | 1.002013531  | 0.000369994 | Up   | 6.31E-05 | PDIA5        |
| 400745    | 4.25  | 8.51  | 1.001696291  | 1.71E-09    | Up   | 1.27E-10 | SH2D5        |
| 56652     | 4.74  | 9.48  | 1            | 1.88E-08    | Up   | 1.59E-09 | C10orf2      |
| 9915      | 3.99  | 7.98  | 1            | 3.89E-14    | Up   | 1.84E-15 | ARNT2        |
| 9825      | 2.5   | 5     | 1            | 5.48E-06    | Up   | 6.63E-07 | SPATA2       |
| 102724594 | 13.06 | 0.01  | -10.35093918 | 2.21E-23    | Down | 5.68E-25 | U2AF1L5      |
| 107985795 | 3.48  | 0.01  | -8.442943496 | 7.18E-05    | Down | 1.06E-05 | LOC107985795 |
| 728239    | 2.58  | 0.01  | -8.011227255 | 2.98E-12    | Down | 1.68E-13 | MAGED4       |
| 102723859 | 2.26  | 0.01  | -7.820178962 | 7.87E-10    | Down | 5.60E-11 | TBC1D3E      |
| 100532731 | 2.18  | 0.01  | -7.768184325 | 1.42E-13    | Down | 7.05E-15 | COMMD3-BMI1  |
| 101060389 | 2.06  | 0.01  | -7.686500527 | 9.61E-09    | Down | 7.86E-10 | LOC101060389 |
| 102724994 | 1.88  | 0.01  | -7.554588852 | 1.59E-08    | Down | 1.33E-09 | LOC102724994 |
| 100302652 | 1.85  | 0.01  | -7.531381461 | 8.51E-07    | Down | 9.12E-08 | GPR75-ASB3   |
| 102723722 | 1.48  | 0.01  | -7.209453366 | 4.39E-05    | Down | 6.24E-06 | LOC102723722 |
| 107987464 | 1.46  | 0.01  | -7.189824559 | 1.92E-07    | Down | 1.87E-08 | LOC107987464 |
| 284040    | 1.39  | 0.01  | -7.118941073 | 2.30E-06    | Down | 2.62E-07 | CDRT4        |
| 100533105 | 1.12  | 0.01  | -6.807354922 | 2.14E-09    | Down | 1.61E-10 | C8orf44-SGK3 |
| 445372    | 0.87  | 0.01  | -6.442943496 | 1.65E-05    | Down | 2.17E-06 | TRIM6-TRIM34 |

|           |       |       |              |             |      |                 |               |
|-----------|-------|-------|--------------|-------------|------|-----------------|---------------|
| 85376     | 0.85  | 0.01  | -6.409390936 | 5.87E-09    | Down | 4.63E-10        | RIMBP3        |
| 107986096 | 0.8   | 0.01  | -6.321928095 | 0.000116587 | Down | 1.79E-05        | LOC107986096  |
| 100996517 | 0.61  | 0.01  | -5.930737338 | 2.65E-08    | Down | 2.26E-09        | LOC100996517  |
| 117283    | 1.35  | 0.07  | -4.269460675 | 1.02E-05    | Down | 1.29E-06        | IP6K3         |
| 51302     | 1.26  | 0.07  | -4.169925001 | 0.000251746 | Down | 4.14E-05        | CYP39A1       |
| 84734     | 3.02  | 0.18  | -4.068479738 | 0.000251841 | Down | 4.14E-05        | FAM167B       |
| 54065     | 5.93  | 0.41  | -3.85433629  | 4.80E-08    | Down | 4.26E-09        | SMIM11A       |
| 286464    | 0.42  | 0.03  | -3.807354922 | 0.000251935 | Down | 4.14E-05        | CFAP47        |
| 339768    | 0.55  | 0.04  | -3.781359714 | 0.000616293 | Down | 0.000110<br>467 | ESPNL         |
| 143686    | 0.41  | 0.04  | -3.357552005 | 2.67E-05    | Down | 3.65E-06        | SESN3         |
| 9037      | 1.67  | 0.19  | -3.135776779 | 1.30E-22    | Down | 3.47E-24        | SEMA5A        |
| 152816    | 2     | 0.27  | -2.888968688 | 0.000152408 | Down | 2.40E-05        | C4orf26       |
| 54664     | 14.25 | 2.01  | -2.825694513 | 2.34E-95    | Down | 9.53E-98        | TMEM106B      |
| 1545      | 0.92  | 0.13  | -2.823122238 | 2.78E-05    | Down | 3.82E-06        | CYP1B1        |
| 9022      | 4.93  | 0.71  | -2.795696717 | 0.000307032 | Down | 5.14E-05        | CLIC3         |
| 100288695 | 2.43  | 0.35  | -2.795529487 | 0.000832592 | Down | 0.000153<br>552 | LIMS4         |
| 84448     | 1.33  | 0.2   | -2.733354341 | 0.0004236   | Down | 7.33E-05        | ABLIM2        |
| 4973      | 83.36 | 12.99 | -2.681953847 | 2.21E-206   | Down | 2.05E-20<br>9   | OLR1          |
| 100529215 | 5.33  | 0.84  | -2.6656743   | 6.19E-15    | Down | 2.73E-16        | ZNF559-ZNF177 |
| 57124     | 2.04  | 0.33  | -2.628031223 | 2.06E-05    | Down | 2.76E-06        | CD248         |
| 4232      | 73.32 | 12.39 | -2.565030598 | 4.46E-172   | Down | 6.88E-17<br>5   | MEST          |

|           |        |       |              |             |      |                 |              |
|-----------|--------|-------|--------------|-------------|------|-----------------|--------------|
| 8344      | 25.83  | 4.37  | -2.563342459 | 4.25E-10    | Down | 2.92E-11        | HIST1H2BE    |
| 107983947 | 3.39   | 0.58  | -2.547160468 | 0.000633132 | Down | 0.000113<br>915 | LOC107983947 |
| 374462    | 1.83   | 0.32  | -2.515699838 | 5.98E-14    | Down | 2.88E-15        | PTPRQ        |
| 169611    | 1.08   | 0.19  | -2.506959989 | 1.37E-06    | Down | 1.50E-07        | OLFML2A      |
| 114800    | 12.58  | 2.43  | -2.372103703 | 1.02E-43    | Down | 1.29E-45        | CCDC85A      |
| 1281      | 33.33  | 6.5   | -2.358309694 | 3.50E-156   | Down | 6.48E-15<br>9   | COL3A1       |
| 11346     | 1.47   | 0.29  | -2.34169135  | 3.18E-07    | Down | 3.19E-08        | SYNPO        |
| 115701    | 2.48   | 0.49  | -2.339486466 | 6.91E-14    | Down | 3.34E-15        | ALPK2        |
| 642778    | 1.52   | 0.31  | -2.293731203 | 0.000359064 | Down | 6.10E-05        | NPIPA3       |
| 148398    | 3.6    | 0.74  | -2.282399731 | 7.07E-08    | Down | 6.44E-09        | SAMD11       |
| 8935      | 4.49   | 0.93  | -2.271412824 | 2.20E-15    | Down | 9.29E-17        | SKAP2        |
| 152007    | 34.17  | 7.13  | -2.260756266 | 6.27E-60    | Down | 5.10E-62        | GLIPR2       |
| 3352      | 2.03   | 0.43  | -2.239071162 | 4.54E-05    | Down | 6.47E-06        | HTR1D        |
| 728498    | 1.3    | 0.28  | -2.215012891 | 4.70E-06    | Down | 5.63E-07        | GOLGA8H      |
| 3855      | 2.8    | 0.61  | -2.198545679 | 0.000945607 | Down | 0.000176<br>67  | KRT7         |
| 120       | 22.31  | 4.91  | -2.183895584 | 8.24E-77    | Down | 4.58E-79        | ADD3         |
| 23308     | 2.36   | 0.52  | -2.182203331 | 0.000114571 | Down | 1.76E-05        | ICOSLG       |
| 84913     | 2.76   | 0.62  | -2.154328146 | 4.92E-09    | Down | 3.83E-10        | ATOH8        |
| 6917      | 137.39 | 30.89 | -2.153065225 | 1.79E-286   | Down | 9.96E-29<br>0   | TCEA1        |
| 84709     | 86.5   | 19.84 | -2.124288107 | 2.34E-85    | Down | 1.11E-87        | MGARP        |
| 100271927 | 3.93   | 0.92  | -2.094823546 | 4.53E-09    | Down | 3.52E-10        | RASA4B       |

|           |        |       |              |             |      |                 |              |
|-----------|--------|-------|--------------|-------------|------|-----------------|--------------|
| 9991      | 17.08  | 4.14  | -2.044605302 | 3.77E-82    | Down | 1.91E-84        | PTBP3        |
| 56918     | 2.02   | 0.49  | -2.043501639 | 0.000945919 | Down | 0.000176<br>67  | C2orf83      |
| 1756      | 4.72   | 1.18  | -2           | 1.22E-20    | Down | 3.64E-22        | DMD          |
| 81493     | 6.33   | 1.6   | -1.984133595 | 1.01E-15    | Down | 4.16E-17        | SYNC         |
| 728741    | 4.05   | 1.04  | -1.96133838  | 2.52E-05    | Down | 3.42E-06        | NPIPB6       |
| 10935     | 108.15 | 28.1  | -1.94439163  | 2.06E-117   | Down | 5.98E-12<br>0   | PRDX3        |
| 102724788 | 5.04   | 1.32  | -1.932885804 | 9.36E-09    | Down | 7.63E-10        | LOC102724788 |
| 223117    | 3.27   | 0.86  | -1.926882071 | 1.44E-15    | Down | 5.95E-17        | SEMA3D       |
| 4091      | 5.04   | 1.36  | -1.889817082 | 1.12E-12    | Down | 6.03E-14        | SMAD6        |
| 8153      | 1.83   | 0.5   | -1.871843649 | 2.87E-05    | Down | 3.96E-06        | RND2         |
| 3280      | 3.43   | 0.94  | -1.867475914 | 0.000990561 | Down | 0.000186<br>353 | HES1         |
| 10085     | 11.59  | 3.19  | -1.861252237 | 3.27E-35    | Down | 5.42E-37        | EDIL3        |
| 142940    | 11.73  | 3.25  | -1.85169139  | 2.76E-25    | Down | 6.48E-27        | TRUB1        |
| 81786     | 23.02  | 6.45  | -1.835516768 | 1.27E-17    | Down | 4.54E-19        | TRIM7        |
| 266727    | 2.03   | 0.57  | -1.832445903 | 0.00054657  | Down | 9.70E-05        | MDGA1        |
| 57484     | 3.46   | 0.98  | -1.819918384 | 1.03E-14    | Down | 4.62E-16        | RNF150       |
| 100133941 | 5.31   | 1.52  | -1.804640537 | 1.53E-07    | Down | 1.47E-08        | CD24         |
| 653       | 4.08   | 1.17  | -1.802060622 | 3.64E-06    | Down | 4.28E-07        | BMP5         |
| 767558    | 42.68  | 12.32 | -1.79255792  | 8.31E-100   | Down | 3.18E-10<br>2   | LUZP6        |
| 10959     | 139.54 | 40.33 | -1.790753428 | 6.53E-177   | Down | 9.67E-18<br>0   | TMED2        |

|        |        |       |              |             |      |               |          |
|--------|--------|-------|--------------|-------------|------|---------------|----------|
| 26994  | 23.88  | 6.99  | -1.772438476 | 1.24E-43    | Down | 1.58E-45      | RNF11    |
| 170689 | 1.02   | 0.3   | -1.765534746 | 0.000535106 | Down | 9.47E-05      | ADAMTS15 |
| 4893   | 38.22  | 11.27 | -1.761840263 | 2.69E-100   | Down | 9.97E-10<br>3 | NRAS     |
| 283078 | 2.37   | 0.7   | -1.759460232 | 0.000229116 | Down | 3.74E-05      | MKX      |
| 10434  | 80.5   | 24.1  | -1.739955637 | 2.26E-122   | Down | 6.13E-12<br>5 | LYPLA1   |
| 6319   | 173.12 | 52.51 | -1.721108303 | 0           | Down | 0             | SCD      |
| 9127   | 5.55   | 1.69  | -1.715464525 | 8.86E-10    | Down | 6.36E-11      | P2RX6    |
| 653145 | 11.72  | 3.57  | -1.71497659  | 8.95E-13    | Down | 4.79E-14      | ANXA8    |
| 2247   | 36.76  | 11.36 | -1.694173932 | 1.67E-139   | Down | 3.81E-14<br>2 | FGF2     |
| 5654   | 3.08   | 0.96  | -1.68182404  | 0.000389202 | Down | 6.66E-05      | HTRA1    |
| 23376  | 10.09  | 3.15  | -1.679502441 | 1.28E-23    | Down | 3.24E-25      | UFL1     |
| 79694  | 4.13   | 1.29  | -1.678770716 | 2.81E-10    | Down | 1.90E-11      | MANEA    |
| 81575  | 3.19   | 1.02  | -1.644987272 | 1.40E-08    | Down | 1.17E-09      | APOLD1   |
| 7041   | 9.79   | 3.14  | -1.640544301 | 9.09E-10    | Down | 6.55E-11      | TGFB1I1  |
| 56925  | 11.47  | 3.7   | -1.632268215 | 1.49E-06    | Down | 1.64E-07      | LXN      |
| 4131   | 6.16   | 1.99  | -1.63016192  | 2.43E-39    | Down | 3.50E-41      | MAP1B    |
| 51014  | 47.02  | 15.25 | -1.624465296 | 1.86E-100   | Down | 6.77E-10<br>3 | TMED7    |
| 23089  | 6.03   | 1.97  | -1.613962372 | 5.02E-21    | Down | 1.45E-22      | PEG10    |
| 5318   | 6.15   | 2.03  | -1.599106683 | 1.80E-14    | Down | 8.24E-16      | PKP2     |
| 11037  | 3.23   | 1.07  | -1.593923368 | 1.64E-09    | Down | 1.22E-10      | STON1    |
| 214    | 38.5   | 12.79 | -1.589842182 | 8.09E-112   | Down | 2.65E-11      | ALCAM    |

|        |        |        |              |             |      |                 |          |
|--------|--------|--------|--------------|-------------|------|-----------------|----------|
| 3426   | 3.99   | 1.33   | -1.584962501 | 0.00012468  | Down | 1.93E-05        | CFI      |
| 3612   | 9.57   | 3.2    | -1.58044702  | 9.55E-17    | Down | 3.62E-18        | IMPA1    |
| 84680  | 2.24   | 0.75   | -1.578536232 | 0.000990886 | Down | 0.000186<br>353 | ACCS     |
| 55809  | 0.83   | 0.28   | -1.567684509 | 0.000127764 | Down | 1.98E-05        | TRERF1   |
| 122060 | 3.17   | 1.08   | -1.553451528 | 5.35E-05    | Down | 7.72E-06        | SLAIN1   |
| 253832 | 19.5   | 6.69   | -1.543396008 | 1.13E-50    | Down | 1.13E-52        | ZDHHC20  |
| 192668 | 2.72   | 0.94   | -1.53287399  | 0.000416009 | Down | 7.18E-05        | CYS1     |
| 85462  | 1.43   | 0.5    | -1.516015147 | 2.44E-05    | Down | 3.30E-06        | FHDC1    |
| 55740  | 18.8   | 6.63   | -1.503651886 | 1.99E-74    | Down | 1.16E-76        | ENAH     |
| 10622  | 12.31  | 4.35   | -1.500743456 | 1.12E-19    | Down | 3.52E-21        | POLR3G   |
| 8359   | 422.17 | 149.82 | -1.494593835 | 1.03E-66    | Down | 7.04E-69        | HIST1H4A |
| 55266  | 20.42  | 7.26   | -1.491941413 | 1.50E-44    | Down | 1.79E-46        | TMEM19   |
| 7058   | 18.08  | 6.43   | -1.491504035 | 7.97E-50    | Down | 8.26E-52        | THBS2    |
| 84333  | 6.19   | 2.21   | -1.48589304  | 6.25E-21    | Down | 1.83E-22        | PCGF5    |
| 197021 | 3.63   | 1.3    | -1.481457925 | 0.000254043 | Down | 4.19E-05        | LCTL     |
| 6443   | 7.8    | 2.8    | -1.478047297 | 9.07E-16    | Down | 3.67E-17        | SGCB     |
| 23443  | 11.33  | 4.08   | -1.473506804 | 6.93E-19    | Down | 2.28E-20        | SLC35A3  |
| 56906  | 5.18   | 1.87   | -1.469913828 | 2.06E-05    | Down | 2.76E-06        | THAP10   |
| 54510  | 1.74   | 0.63   | -1.465663572 | 6.72E-05    | Down | 9.85E-06        | PCDH18   |
| 3094   | 355.28 | 128.65 | -1.465505019 | 1.01E-105   | Down | 3.54E-10<br>8   | HINT1    |
| 6102   | 6.08   | 2.21   | -1.460024954 | 4.88E-11    | Down | 3.05E-12        | RP2      |

|        |       |        |              |             |      |                 |          |
|--------|-------|--------|--------------|-------------|------|-----------------|----------|
| 219539 | 3.02  | 1.1    | -1.457045026 | 6.71E-05    | Down | 9.85E-06        | YPEL4    |
| 5587   | 5.16  | 1.88   | -1.456638404 | 3.65E-09    | Down | 2.81E-10        | PRKD1    |
| 1031   | 44.13 | 16.11  | -1.453803253 | 1.94E-38    | Down | 2.89E-40        | CDKN2C   |
| 255783 | 8.53  | 3.12   | -1.450999712 | 0.000992513 | Down | 0.000187<br>026 | INAFM1   |
| 54961  | 6.76  | 2.48   | -1.446683126 | 3.60E-09    | Down | 2.77E-10        | SSH3     |
| 10097  | 44.56 | 16.36  | -1.445576484 | 1.16E-77    | Down | 6.37E-80        | ACTR2    |
| 9415   | 30.32 | 11.18  | -1.439349565 | 8.64E-45    | Down | 1.02E-46        | FADS2    |
| 10040  | 14.97 | 5.53   | -1.436722836 | 2.01E-16    | Down | 7.75E-18        | TOM1L1   |
| 3897   | 5.82  | 2.15   | -1.436682493 | 1.80E-13    | Down | 9.05E-15        | L1CAM    |
| 8294   | 497.8 | 184.08 | -1.435233342 | 7.46E-74    | Down | 4.42E-76        | HIST1H4I |
| 3398   | 8.69  | 3.22   | -1.432295489 | 8.57E-06    | Down | 1.07E-06        | ID2      |
| 286144 | 4.18  | 1.55   | -1.431234727 | 2.14E-07    | Down | 2.10E-08        | TRIQQ    |
| 219654 | 2.96  | 1.1    | -1.428093652 | 1.94E-06    | Down | 2.17E-07        | ZCCHC24  |
| 6856   | 15.47 | 5.75   | -1.427839336 | 9.95E-16    | Down | 4.08E-17        | SYPL1    |
| 7108   | 20.7  | 7.71   | -1.424828002 | 1.15E-14    | Down | 5.18E-16        | TM7SF2   |
| 3077   | 17.13 | 6.4    | -1.420381341 | 1.94E-19    | Down | 6.20E-21        | HFE      |
| 83463  | 21.81 | 8.17   | -1.416581786 | 5.39E-12    | Down | 3.09E-13        | MXD3     |
| 2774   | 1.52  | 0.57   | -1.415037499 | 0.000254138 | Down | 4.19E-05        | GNAL     |
| 158219 | 5.14  | 1.93   | -1.413167512 | 1.40E-07    | Down | 1.33E-08        | TTC39B   |
| 3955   | 3.3   | 1.24   | -1.412125904 | 0.000148166 | Down | 2.33E-05        | LFNG     |
| 4781   | 3.74  | 1.41   | -1.407343107 | 6.99E-14    | Down | 3.38E-15        | NFIB     |
| 3676   | 4.27  | 1.61   | -1.407175382 | 1.45E-18    | Down | 4.90E-20        | ITGA4    |
| 57181  | 17.63 | 6.65   | -1.406606229 | 1.30E-40    | Down | 1.79E-42        | SLC39A10 |

|           |        |        |              |             |      |                 |          |
|-----------|--------|--------|--------------|-------------|------|-----------------|----------|
| 9530      | 23.91  | 9.03   | -1.404816237 | 1.68E-45    | Down | 1.96E-47        | BAG4     |
| 284611    | 6.37   | 2.41   | -1.402260226 | 9.12E-15    | Down | 4.08E-16        | FAM102B  |
| 286410    | 11.99  | 4.54   | -1.401067456 | 7.49E-35    | Down | 1.26E-36        | ATP11C   |
| 7351      | 6.86   | 2.62   | -1.388641765 | 3.24E-05    | Down | 4.50E-06        | UCP2     |
| 51200     | 52.84  | 20.32  | -1.378730064 | 2.42E-61    | Down | 1.90E-63        | CPA4     |
| 23456     | 17.16  | 6.6    | -1.378511623 | 2.26E-26    | Down | 5.11E-28        | ABCB10   |
| 103344718 | 2.96   | 1.14   | -1.376563351 | 2.64E-05    | Down | 3.61E-06        | HOTS     |
| 83879     | 32.38  | 12.51  | -1.372021196 | 7.77E-35    | Down | 1.31E-36        | CDCA7    |
| 4026      | 6.96   | 2.7    | -1.366127899 | 2.81E-39    | Down | 4.06E-41        | LPP      |
| 57493     | 7.06   | 2.74   | -1.36549229  | 2.83E-27    | Down | 6.19E-29        | HEG1     |
| 54842     | 2      | 0.78   | -1.358453971 | 0.000239324 | Down | 3.92E-05        | MFSD6    |
| 8676      | 2.23   | 0.87   | -1.357956404 | 7.92E-05    | Down | 1.18E-05        | STX11    |
| 122953    | 25.2   | 9.85   | -1.355228104 | 9.51E-24    | Down | 2.39E-25        | JDP2     |
| 51523     | 22.69  | 8.87   | -1.355050599 | 1.03E-23    | Down | 2.60E-25        | CXXC5    |
| 139231    | 12.09  | 4.74   | -1.35085528  | 6.22E-37    | Down | 9.67E-39        | FAM199X  |
| 157567    | 6.63   | 2.6    | -1.350497247 | 1.97E-07    | Down | 1.92E-08        | ANKRD46  |
| 2736      | 1.35   | 0.53   | -1.348895142 | 0.000657748 | Down | 0.000118<br>831 | GLI2     |
| 57534     | 60.86  | 23.9   | -1.348483716 | 6.96E-146   | Down | 1.50E-14<br>8   | MIB1     |
| 6674      | 7.12   | 2.81   | -1.341307111 | 5.27E-08    | Down | 4.72E-09        | SPAG1    |
| 8353      | 255.17 | 100.72 | -1.341108535 | 8.60E-44    | Down | 1.08E-45        | HIST1H3E |
| 4325      | 12.4   | 4.9    | -1.339486466 | 1.79E-31    | Down | 3.29E-33        | MMP16    |
| 221830    | 11.31  | 4.47   | -1.339252193 | 1.04E-17    | Down | 3.68E-19        | TWISTNB  |

|        |        |        |              |             |      |                 |          |
|--------|--------|--------|--------------|-------------|------|-----------------|----------|
| 8683   | 158.74 | 62.93  | -1.334845863 | 1.19E-73    | Down | 7.11E-76        | SRSF9    |
| 11007  | 73.77  | 29.27  | -1.33361149  | 1.66E-36    | Down | 2.64E-38        | CCDC85B  |
| 201625 | 0.68   | 0.27   | -1.332575339 | 0.000627809 | Down | 0.000112<br>802 | DNAH12   |
| 51021  | 93.9   | 37.41  | -1.327701192 | 4.25E-68    | Down | 2.86E-70        | MRPS16   |
| 427    | 9.96   | 3.97   | -1.327006735 | 6.56E-11    | Down | 4.15E-12        | ASAH1    |
| 2631   | 19.65  | 7.86   | -1.321928095 | 1.37E-15    | Down | 5.67E-17        | NIPSNAP2 |
| 4281   | 4.31   | 1.73   | -1.316915831 | 5.48E-06    | Down | 6.62E-07        | MID1     |
| 51170  | 12.95  | 5.2    | -1.31636857  | 5.97E-07    | Down | 6.25E-08        | HSD17B11 |
| 8360   | 482.15 | 194.44 | -1.310157009 | 7.42E-62    | Down | 5.77E-64        | HIST1H4D |
| 79633  | 2.67   | 1.08   | -1.30580843  | 1.73E-17    | Down | 6.25E-19        | FAT4     |
| 55972  | 4.82   | 1.95   | -1.305559022 | 3.30E-06    | Down | 3.86E-07        | SLC25A40 |
| 1808   | 12.63  | 5.11   | -1.305459443 | 1.11E-22    | Down | 2.96E-24        | DPYSL2   |
| 7153   | 134.43 | 54.42  | -1.304646271 | 2.84E-297   | Down | 1.40E-30<br>0   | TOP2A    |
| 360023 | 7.54   | 3.06   | -1.301032871 | 5.34E-22    | Down | 1.48E-23        | ZBTB41   |
| 5567   | 5.48   | 2.23   | -1.297132183 | 3.41E-09    | Down | 2.61E-10        | PRKACB   |
| 84962  | 61.05  | 24.87  | -1.295584788 | 5.16E-66    | Down | 3.59E-68        | AJUBA    |
| 3489   | 142.39 | 58.16  | -1.291748656 | 4.24E-50    | Down | 4.35E-52        | IGFBP6   |
| 148213 | 3.94   | 1.61   | -1.291134941 | 3.93E-10    | Down | 2.69E-11        | ZNF681   |
| 3007   | 378.57 | 154.79 | -1.290247817 | 7.95E-106   | Down | 2.75E-10<br>8   | HIST1H1D |
| 2044   | 2.22   | 0.91   | -1.286621226 | 1.01E-06    | Down | 1.09E-07        | EPHA5    |
| 51088  | 15.68  | 6.47   | -1.277087942 | 3.63E-30    | Down | 6.99E-32        | KLHL5    |

|        |       |       |              |           |      |               |          |
|--------|-------|-------|--------------|-----------|------|---------------|----------|
| 59345  | 30.14 | 12.44 | -1.276692931 | 6.14E-69  | Down | 4.06E-71      | GNB4     |
| 79624  | 13.06 | 5.43  | -1.266130794 | 9.28E-13  | Down | 4.97E-14      | ARMT1    |
| 56951  | 30.39 | 12.7  | -1.258768178 | 3.18E-25  | Down | 7.50E-27      | C5orf15  |
| 79699  | 20.22 | 8.46  | -1.257053429 | 4.99E-44  | Down | 6.19E-46      | ZYG11B   |
| 79948  | 5.66  | 2.37  | -1.255914994 | 2.22E-05  | Down | 3.00E-06      | PLPPR3   |
| 160418 | 19.54 | 8.21  | -1.25097634  | 2.60E-44  | Down | 3.17E-46      | TMTC3    |
| 3075   | 5.84  | 2.46  | -1.247310054 | 3.47E-07  | Down | 3.49E-08      | CFH      |
| 286148 | 7.95  | 3.36  | -1.242493627 | 1.24E-17  | Down | 4.41E-19      | DPY19L4  |
| 1977   | 31.25 | 13.21 | -1.242225723 | 2.13E-37  | Down | 3.28E-39      | EIF4E    |
| 23657  | 60.6  | 25.65 | -1.240358968 | 2.06E-162 | Down | 3.57E-16<br>5 | SLC7A11  |
| 5525   | 12.74 | 5.4   | -1.238333965 | 2.28E-14  | Down | 1.05E-15      | PPP2R5A  |
| 5575   | 4.67  | 1.98  | -1.23792212  | 5.20E-05  | Down | 7.47E-06      | PRKAR1B  |
| 25998  | 16.65 | 7.06  | -1.237782089 | 8.37E-37  | Down | 1.31E-38      | IBTK     |
| 50484  | 9.4   | 4.01  | -1.22905852  | 2.03E-16  | Down | 7.84E-18      | RRM2B    |
| 7059   | 11.01 | 4.7   | -1.228081807 | 1.12E-12  | Down | 6.08E-14      | THBS3    |
| 85012  | 16.06 | 6.87  | -1.225089889 | 8.17E-07  | Down | 8.73E-08      | TCEAL3   |
| 7915   | 12.81 | 5.48  | -1.225022677 | 5.23E-23  | Down | 1.36E-24      | ALDH5A1  |
| 29994  | 2.71  | 1.16  | -1.224168046 | 6.56E-07  | Down | 6.93E-08      | BAZ2B    |
| 4258   | 20.41 | 8.75  | -1.22192126  | 1.12E-05  | Down | 1.42E-06      | MGST2    |
| 8519   | 20.43 | 8.77  | -1.220040456 | 1.59E-05  | Down | 2.09E-06      | IFITM1   |
| 497661 | 13.19 | 5.67  | -1.218023924 | 1.63E-08  | Down | 1.37E-09      | C18orf32 |
| 54165  | 11.46 | 4.93  | -1.216947492 | 1.40E-21  | Down | 3.93E-23      | DCUN1D1  |
| 55204  | 11.11 | 4.79  | -1.213761256 | 2.17E-12  | Down | 1.20E-13      | GOLPH3L  |

|           |        |       |              |             |      |          |         |
|-----------|--------|-------|--------------|-------------|------|----------|---------|
| 55314     | 3.36   | 1.45  | -1.212408333 | 0.00030695  | Down | 5.14E-05 | TMEM144 |
| 55635     | 36.73  | 15.9  | -1.207932131 | 2.47E-66    | Down | 1.71E-68 | DEPDC1  |
| 100129543 | 8.54   | 3.7   | -1.206710799 | 4.01E-08    | Down | 3.52E-09 | ZNF730  |
| 51        | 21.2   | 9.19  | -1.205927498 | 8.70E-54    | Down | 8.00E-56 | ACOX1   |
| 83849     | 1.52   | 0.66  | -1.203533394 | 6.58E-06    | Down | 8.09E-07 | SYT15   |
| 6876      | 190.64 | 83.13 | -1.19740974  | 6.55E-74    | Down | 3.84E-76 | TAGLN   |
| 283431    | 16.18  | 7.07  | -1.194429488 | 2.81E-19    | Down | 9.03E-21 | GAS2L3  |
| 55088     | 2.56   | 1.12  | -1.192645078 | 8.34E-06    | Down | 1.04E-06 | CCDC186 |
| 55715     | 13.02  | 5.7   | -1.191695624 | 6.51E-12    | Down | 3.77E-13 | DOK4    |
| 149473    | 10.69  | 4.68  | -1.191681418 | 0.000477631 | Down | 8.36E-05 | CCDC24  |
| 4837      | 131.69 | 57.69 | -1.190752629 | 9.54E-68    | Down | 6.48E-70 | NNMT    |
| 5698      | 35.42  | 15.52 | -1.190435655 | 2.44E-12    | Down | 1.36E-13 | PSMB9   |
| 317       | 16.53  | 7.25  | -1.189033824 | 3.53E-36    | Down | 5.70E-38 | APAF1   |
| 6990      | 7.02   | 3.08  | -1.18854068  | 1.12E-05    | Down | 1.42E-06 | DYNLT3  |
| 25843     | 16.04  | 7.04  | -1.188026808 | 4.08E-20    | Down | 1.25E-21 | MOB4    |
| 3234      | 5.92   | 2.6   | -1.187085553 | 5.91E-06    | Down | 7.19E-07 | HOXD8   |
| 388591    | 7.42   | 3.26  | -1.186547222 | 9.84E-10    | Down | 7.11E-11 | RNF207  |
| 5764      | 10.59  | 4.66  | -1.184300729 | 1.52E-05    | Down | 1.98E-06 | PTN     |
| 51053     | 81.83  | 36.07 | -1.181830429 | 2.76E-33    | Down | 4.80E-35 | GMNN    |
| 3953      | 11.33  | 5     | -1.180147861 | 2.21E-17    | Down | 8.02E-19 | LEPR    |
| 60529     | 2.53   | 1.12  | -1.175638653 | 4.37E-05    | Down | 6.20E-06 | ALX4    |
| 6583      | 4.76   | 2.11  | -1.173718575 | 0.000997338 | Down | 0.000188 | SLC22A4 |
|           |        |       |              |             |      | 12       |         |
| 115106    | 45.57  | 20.26 | -1.169450196 | 1.08E-16    | Down | 4.11E-18 | HAUS1   |

|        |       |       |              |             |      |          |          |
|--------|-------|-------|--------------|-------------|------|----------|----------|
| 51084  | 8.25  | 3.67  | -1.168614056 | 0.000212742 | Down | 3.45E-05 | CRYL1    |
| 23129  | 10.51 | 4.7   | -1.161030007 | 2.70E-12    | Down | 1.51E-13 | PLXND1   |
| 81031  | 6.54  | 2.93  | -1.158389971 | 2.35E-09    | Down | 1.77E-10 | SLC2A10  |
| 64065  | 8.78  | 3.94  | -1.15602531  | 2.39E-12    | Down | 1.33E-13 | PERP     |
| 3400   | 3.32  | 1.49  | -1.155870911 | 0.00011084  | Down | 1.70E-05 | ID4      |
| 6091   | 17.93 | 8.05  | -1.1553148   | 1.56E-41    | Down | 2.10E-43 | ROBO1    |
| 54492  | 1.87  | 0.84  | -1.154577037 | 0.000338235 | Down | 5.71E-05 | NEURL1B  |
| 127933 | 28.38 | 12.77 | -1.152116064 | 3.50E-76    | Down | 1.96E-78 | UHMK1    |
| 135293 | 19.11 | 8.6   | -1.151919213 | 1.07E-14    | Down | 4.83E-16 | PM20D2   |
| 26973  | 38.64 | 17.41 | -1.150178891 | 2.01E-40    | Down | 2.78E-42 | CHORDC1  |
| 51144  | 32.94 | 14.85 | -1.149377624 | 1.83E-23    | Down | 4.67E-25 | HSD17B12 |
| 23306  | 24.22 | 10.92 | -1.149226009 | 1.09E-47    | Down | 1.22E-49 | NEMP1    |
| 2633   | 4.69  | 2.12  | -1.145523658 | 3.51E-05    | Down | 4.91E-06 | GBP1     |
| 6618   | 17.65 | 7.98  | -1.145207532 | 6.36E-09    | Down | 5.07E-10 | SNAPC2   |
| 116068 | 6.21  | 2.81  | -1.144023138 | 3.78E-09    | Down | 2.91E-10 | LYSMD3   |
| 54930  | 41.43 | 18.76 | -1.143015992 | 8.85E-21    | Down | 2.62E-22 | HAUS4    |
| 91752  | 4.08  | 1.85  | -1.141043881 | 1.68E-06    | Down | 1.86E-07 | ZNF804A  |
| 1468   | 36.2  | 16.42 | -1.14053557  | 2.39E-22    | Down | 6.52E-24 | SLC25A10 |
| 8790   | 9.68  | 4.4   | -1.137503524 | 3.96E-14    | Down | 1.87E-15 | FPGT     |
| 25978  | 14.43 | 6.58  | -1.132911811 | 4.04E-12    | Down | 2.30E-13 | CHMP2B   |
| 9768   | 98.03 | 44.71 | -1.132625777 | 2.07E-44    | Down | 2.51E-46 | PCLAF    |
| 23101  | 2.63  | 1.2   | -1.132028394 | 2.47E-05    | Down | 3.35E-06 | MCF2L2   |
| 388962 | 76.11 | 34.8  | -1.128998714 | 3.41E-12    | Down | 1.93E-13 | BOLA3    |

|        |       |       |              |             |      |                 |           |
|--------|-------|-------|--------------|-------------|------|-----------------|-----------|
| 6492   | 3.87  | 1.77  | -1.128584206 | 6.50E-08    | Down | 5.90E-09        | SIM1      |
| 1182   | 17.4  | 7.96  | -1.12824697  | 7.97E-21    | Down | 2.35E-22        | CLCN3     |
| 64110  | 30.16 | 13.81 | -1.126923109 | 1.11E-15    | Down | 4.58E-17        | MAGEF1    |
| 26227  | 5.39  | 2.47  | -1.125774231 | 0.000680151 | Down | 0.000123<br>256 | PHGDH     |
| 2332   | 9.95  | 4.56  | -1.125662701 | 1.49E-13    | Down | 7.39E-15        | FMR1      |
| 223082 | 4.8   | 2.2   | -1.125530882 | 1.29E-05    | Down | 1.65E-06        | ZNRF2     |
| 51196  | 2.94  | 1.35  | -1.122856748 | 2.05E-06    | Down | 2.31E-07        | PLCE1     |
| 130576 | 10.34 | 4.76  | -1.119202707 | 1.77E-05    | Down | 2.35E-06        | LYPD6B    |
| 51574  | 16.12 | 7.43  | -1.117417628 | 6.95E-11    | Down | 4.42E-12        | LARP7     |
| 728392 | 28.12 | 13.01 | -1.111975632 | 9.76E-13    | Down | 5.24E-14        | LOC728392 |
| 253982 | 11.65 | 5.39  | -1.111972777 | 1.66E-05    | Down | 2.19E-06        | ASPHD1    |
| 1353   | 31.76 | 14.75 | -1.106495958 | 2.40E-14    | Down | 1.11E-15        | COX11     |
| 151473 | 5.06  | 2.35  | -1.106476628 | 1.23E-07    | Down | 1.16E-08        | SLC16A14  |
| 6715   | 15.24 | 7.1   | -1.101971973 | 3.43E-11    | Down | 2.12E-12        | SRD5A1    |
| 5911   | 7.14  | 3.33  | -1.100401897 | 1.57E-09    | Down | 1.17E-10        | RAP2A     |
| 54507  | 4.93  | 2.3   | -1.099953785 | 7.36E-08    | Down | 6.72E-09        | ADAMTSL4  |
| 5292   | 23.68 | 11.07 | -1.097013859 | 4.31E-19    | Down | 1.40E-20        | PIM1      |
| 81537  | 40.42 | 18.92 | -1.095157233 | 1.31E-39    | Down | 1.87E-41        | SGPP1     |
| 5523   | 3.94  | 1.85  | -1.090670359 | 1.41E-08    | Down | 1.18E-09        | PPP2R3A   |
| 3714   | 4.51  | 2.12  | -1.089063169 | 4.52E-08    | Down | 3.99E-09        | JAG2      |
| 8908   | 9.46  | 4.45  | -1.088034847 | 1.54E-09    | Down | 1.14E-10        | GYG2      |
| 51435  | 10.2  | 4.8   | -1.087462841 | 3.61E-10    | Down | 2.47E-11        | SCARA3    |
| 874    | 21.75 | 10.24 | -1.086799686 | 1.61E-07    | Down | 1.55E-08        | CBR3      |

|        |       |        |              |           |      |          |          |
|--------|-------|--------|--------------|-----------|------|----------|----------|
| 5825   | 46.61 | 21.95  | -1.086418573 | 1.83E-35  | Down | 3.03E-37 | ABCD3    |
| 55872  | 41.45 | 19.54  | -1.084941634 | 5.41E-25  | Down | 1.29E-26 | PBK      |
| 1386   | 22.41 | 10.57  | -1.084167272 | 6.22E-23  | Down | 1.62E-24 | ATF2     |
| 10681  | 14.64 | 6.91   | -1.083157938 | 7.84E-14  | Down | 3.82E-15 | GNB5     |
| 7008   | 4.65  | 2.2    | -1.079727192 | 2.39E-06  | Down | 2.75E-07 | TEF      |
| 30832  | 9.91  | 4.7    | -1.076224301 | 1.16E-16  | Down | 4.44E-18 | ZNF354C  |
| 23098  | 4.47  | 2.12   | -1.076210567 | 1.09E-09  | Down | 7.91E-11 | SARM1    |
| 2764   | 47.65 | 22.6   | -1.076153441 | 2.14E-55  | Down | 1.86E-57 | GMFB     |
| 114882 | 18.82 | 8.93   | -1.075534548 | 1.58E-38  | Down | 2.35E-40 | OSBPL8   |
| 65084  | 10.85 | 5.16   | -1.072252072 | 2.66E-13  | Down | 1.36E-14 | TMEM135  |
| 121274 | 10.74 | 5.11   | -1.071598797 | 2.51E-14  | Down | 1.17E-15 | ZNF641   |
| 221    | 22.67 | 10.8   | -1.069753079 | 1.13E-18  | Down | 3.78E-20 | ALDH3B1  |
| 6281   | 44.26 | 21.1   | -1.068760452 | 3.10E-13  | Down | 1.59E-14 | S100A10  |
| 9064   | 6.75  | 3.22   | -1.067826814 | 1.23E-07  | Down | 1.16E-08 | MAP3K6   |
| 55728  | 4.84  | 2.31   | -1.067114196 | 4.32E-13  | Down | 2.26E-14 | N4BP2    |
| 221079 | 11.39 | 5.44   | -1.06608919  | 1.91E-25  | Down | 4.48E-27 | ARL5B    |
| 4591   | 29.32 | 14.03  | -1.063370095 | 9.81E-31  | Down | 1.85E-32 | TRIM37   |
| 90488  | 41.13 | 19.72  | -1.06053152  | 6.21E-39  | Down | 9.07E-41 | TMEM263  |
| 134429 | 26.09 | 12.51  | -1.060415155 | 8.34E-37  | Down | 1.31E-38 | STARD4   |
| 23468  | 29.67 | 14.25  | -1.058043008 | 1.02E-94  | Down | 4.20E-97 | CBX5     |
| 55701  | 9.64  | 4.63   | -1.058020953 | 1.98E-15  | Down | 8.35E-17 | ARHGEF40 |
| 5962   | 57.26 | 27.51  | -1.057571531 | 4.11E-84  | Down | 1.98E-86 | RDX      |
| 8351   | 651.4 | 313.04 | -1.057196704 | 6.50E-159 | Down | 1.16E-16 | HIST1H3D |

|        |        |        |              |             |      |          |         |
|--------|--------|--------|--------------|-------------|------|----------|---------|
| 10278  | 4.6    | 2.22   | -1.051074185 | 0.000125026 | Down | 1.94E-05 | EFS     |
| 6738   | 33.55  | 16.22  | -1.048538947 | 4.01E-92    | Down | 1.68E-94 | TROVE2  |
| 4130   | 1.26   | 0.61   | -1.046542586 | 0.000303832 | Down | 5.08E-05 | MAP1A   |
| 57107  | 7.45   | 3.61   | -1.045241588 | 1.85E-05    | Down | 2.47E-06 | PDSS2   |
| 1033   | 239.07 | 115.89 | -1.04467702  | 2.27E-52    | Down | 2.19E-54 | CDKN3   |
| 57045  | 28.01  | 13.58  | -1.044458504 | 1.52E-28    | Down | 3.12E-30 | TWSG1   |
| 133418 | 12.31  | 5.97   | -1.044027925 | 1.56E-14    | Down | 7.10E-16 | EMB     |
| 92140  | 21.64  | 10.5   | -1.043311171 | 1.16E-34    | Down | 1.98E-36 | MTDH    |
| 128    | 52.88  | 25.7   | -1.040953817 | 2.19E-37    | Down | 3.40E-39 | ADH5    |
| 11187  | 28.74  | 14.02  | -1.035573712 | 4.94E-22    | Down | 1.36E-23 | PKP3    |
| 892    | 29.5   | 14.4   | -1.034646143 | 8.16E-24    | Down | 2.03E-25 | CCNC    |
| 149345 | 14.07  | 6.87   | -1.034240324 | 1.34E-06    | Down | 1.46E-07 | SHISA4  |
| 7846   | 135.73 | 66.31  | -1.033441271 | 4.13E-68    | Down | 2.75E-70 | TUBA1A  |
| 653464 | 21.94  | 10.72  | -1.03325862  | 1.53E-25    | Down | 3.58E-27 | SRGAP2C |
| 85313  | 12.77  | 6.25   | -1.03083043  | 5.69E-09    | Down | 4.47E-10 | PPIL4   |
| 112817 | 7.64   | 3.74   | -1.030534368 | 8.11E-06    | Down | 1.01E-06 | HOGA1   |
| 9666   | 14.82  | 7.26   | -1.029503994 | 1.10E-19    | Down | 3.43E-21 | DZIP3   |
| 79144  | 20.47  | 10.03  | -1.029189496 | 0.000104786 | Down | 1.59E-05 | PPDPF   |
| 1633   | 17.75  | 8.7    | -1.028731719 | 1.66E-12    | Down | 9.06E-14 | DCK     |
| 199777 | 6.44   | 3.16   | -1.02713613  | 3.32E-07    | Down | 3.34E-08 | ZNF626  |
| 51122  | 13.17  | 6.47   | -1.025417728 | 3.51E-13    | Down | 1.83E-14 | COMMD2  |
| 55742  | 11.48  | 5.64   | -1.025355574 | 2.89E-26    | Down | 6.57E-28 | PARVA   |
| 5101   | 5.17   | 2.54   | -1.025335784 | 7.43E-10    | Down | 5.28E-11 | PCDH9   |

|        |        |       |              |             |      |          |           |
|--------|--------|-------|--------------|-------------|------|----------|-----------|
| 285605 | 4.92   | 2.42  | -1.023651268 | 2.55E-08    | Down | 2.17E-09 | DTWD2     |
| 8346   | 794.64 | 391   | -1.023132809 | 2.36E-83    | Down | 1.18E-85 | HIST1H2BI |
| 23600  | 8.29   | 4.08  | -1.02280295  | 7.22E-06    | Down | 8.92E-07 | AMACR     |
| 6817   | 45.28  | 22.29 | -1.022477342 | 4.35E-15    | Down | 1.88E-16 | SULT1A1   |
| 4942   | 69.37  | 34.23 | -1.019050592 | 9.09E-37    | Down | 1.44E-38 | OAT       |
| 10513  | 17.45  | 8.62  | -1.017467262 | 1.50E-29    | Down | 2.98E-31 | APPBP2    |
| 201895 | 8      | 3.96  | -1.01449957  | 1.57E-11    | Down | 9.37E-13 | SMIM14    |
| 7289   | 23.58  | 11.68 | -1.013523444 | 2.60E-21    | Down | 7.35E-23 | TULP3     |
| 23564  | 70.34  | 34.86 | -1.012772765 | 2.59E-23    | Down | 6.68E-25 | DDAH2     |
| 65983  | 10.53  | 5.22  | -1.012383724 | 1.25E-07    | Down | 1.18E-08 | GRAMD3    |
| 6683   | 15.06  | 7.47  | -1.011541622 | 1.03E-17    | Down | 3.66E-19 | SPAST     |
| 348110 | 9.23   | 4.58  | -1.01098305  | 2.71E-14    | Down | 1.26E-15 | ARPIN     |
| 90806  | 12.57  | 6.24  | -1.010366716 | 1.88E-15    | Down | 7.86E-17 | ANGEL2    |
| 10810  | 5.11   | 2.54  | -1.008494794 | 7.00E-07    | Down | 7.42E-08 | WASF3     |
| 51315  | 11.99  | 5.97  | -1.006028822 | 1.19E-05    | Down | 1.52E-06 | KRCC1     |
| 135112 | 7.75   | 3.86  | -1.005595463 | 6.64E-10    | Down | 4.68E-11 | NCOA7     |
| 10447  | 13.3   | 6.63  | -1.00434547  | 5.87E-09    | Down | 4.63E-10 | FAM3C     |
| 91663  | 11.37  | 5.67  | -1.003811614 | 7.96E-10    | Down | 5.67E-11 | MYADM     |
| 23371  | 5.33   | 2.66  | -1.002709287 | 4.63E-07    | Down | 4.74E-08 | TNS2      |
| 10398  | 72.22  | 36.08 | -1.001199082 | 3.42E-21    | Down | 9.72E-23 | MYL9      |
| 54494  | 6.96   | 3.48  | -1           | 0.000191913 | Down | 3.08E-05 | C11orf71  |

---
